# Supplementary material
Source: publisher figshare collection journal article supplement (https://gsapubs.figshare.com/ndownloader/files/23298287)
Supplement: Supplementary file 1 [file 23298287]

**Crush-Leach and Microthermometry**

A Linkam THMSG-600 cooling-heating stage in connection with synthetic fluid inclusion standards was used to conduct microthermometric measurements (Table A1). Samples suitable for crush-leach analysis (c.f. those with only one fluid type) were crushed to a grain size of 0.5 to 1 mm. Each 2 g per sample (fluorite, quartz, calcite) was carefully hand-picked to remove visible impurities, heated in a beaker to 60-70 °C for 3 hours using concentrated HNO<sub>3</sub> and washed twice a day with Milli-Q-water for one week. Subsequently, these samples were hand-crushed to a fine powder and 5 ml acidulated Milli-Q-water (pH ~ 2) was added. These solutions were filtered (CROMAFIL® Xtra RC-20/25) and injected into a Dionex ICS 1000 ion chromatography system at the University of Tübingen equipped with an IonPac AS 9-HC 2 mm column for Cl and Br determination. Detection limits for Cl and Br were at the ppb level and based on the frequent analyses of standard solutions, relative uncertainties are generally  $\leq 15\%$  (1-sigma level). We checked for possible contamination by performing blank runs.

TABLE DR1. CRUSH-LEACH AND MICROTHERMOMETRY DATA

| Sample | latitude*  | longitude* | location             | gangue mineral | Salinity (NaCl+CaCl <sub>2</sub> ) | Cl/Br mass ratio |
|--------|------------|------------|----------------------|----------------|------------------------------------|------------------|
| F15    | 47.664267  | 7.923798   | Wehratal             | fluorite       | 21.5 ± 0.5                         | 237±53           |
| F16    | 47.683817  | 8.253700   | Nöggenschwiel        | fluorite       | 25.7 ± 0.4                         | 117±35           |
| GS28a  | 47.722646  | 8.120855   | Schwarzwaldsegen     | fluorite       | 22.7 ± 0.5                         | 103±31           |
| 42FI   | 47.757750  | 8.279599   | Igelschlatt          | fluorite       | 23.2 ± 0.5                         | 300±90           |
| BW32   | 47.757750  | 8.279599   | Igelschlatt          | fluorite       | 23.2 ± 0.5                         | 161±48           |
| ML-23  | 47.757750  | 8.279599   | Igelschlatt          | fluorite       | 23.2 ± 0.5                         | 267±80           |
| BW-22  | 47.832544  | 7.903407   | Finstergrund         | fluorite       | 25.5 ± 0.3                         | 372±112          |
| ML-19  | 47.832544  | 7.903407   | Finstergrund         | fluorite       | 25.5 ± 0.3                         | 423±127          |
| BW178  | 47.832544  | 7.903407   | Finstergrund         | fluorite       | 25.5 ± 0.3                         | 170±51           |
| ML-37  | 47.830915  | 7.819548   | Herrenwald           | quartz         | 24.6 ± 5.0                         | 185±55           |
| ML-13  | 47.909642  | 7.898767   | Schauinsland         | quartz         | 24.6 ± 0.3                         | 118±35           |
| GS92   | 47.7414435 | 8.232401   | Brenden              | fluorite       | 22.9 ± 1.3                         | 268±80           |
| 24FI   | 47.7414435 | 8.232401   | Brenden              | fluorite       | 22.9 ± 1.3                         | 569±171          |
| BO90   | 47.859206  | 7.743900   | Wonnen Nord          | quartz         | 23.9 ± 1.5                         | 117±35           |
| BW9    | 47.751106  | 8.108111   | Neue Hoffnung Gottes | fluorite       | 22.1 ± 1.0                         | 117±35           |
| ML-25  | 47.841301  | 7.972786   | Brandenberg          | fluorite       | 23.0 ± 1.0                         | 132±40           |
| GS111F | 47.841301  | 7.972786   | Brandenberg          | fluorite       | 23.0 ± 1.0                         | 133±40           |
| GS111Q | 47.841301  | 7.972786   | Brandenberg          | quartz         | 22.9 ± 1.0                         | 151±45           |
| GS111  | 47.841301  | 7.972786   | Brandenberg          | fluorite       | 23.0 ± 1.0                         | 131±39           |
| GS83   | 47.841301  | 7.972786   | Brandenberg          | fluorite       | 23.0 ± 1.0                         | 296±89           |
| BW56   | 47.841301  | 7.972786   | Waldschweine         | fluorite       | 20.1 ± 2.5                         | 177±53           |
| FP19   | 47.793183  | 7.798217   | Nonnenmattweiher     | fluorite       | 24.0 ± 0.4                         | 85±26            |
| FP19   | 47.792210  | 7.796888   | Nonnenmattweiher     | fluorite       | 24.0 ± 0.4                         | 59±18            |
| ML42   | 47.724685  | 8.120925   | Gottesehre Urberg    | calcite        | 19.8 ± 3.2                         | 142±43           |

\* UTM coordinates zones 32U and 32T. WGS84
